# Supplementary material
Source: MDPI journal article supplement (https://www.mdpi.com/2227-9091/5/2/23)

death rate forecast

0.0035  
0.0025  
0.0015

- true death rate
- - AM forecast
- - AM 5% and 95% quantiles
- . LC forecast
- . LC 5% and 95% quantiles

1998 2000 2002 2004 2006 2008 2010 2012

year

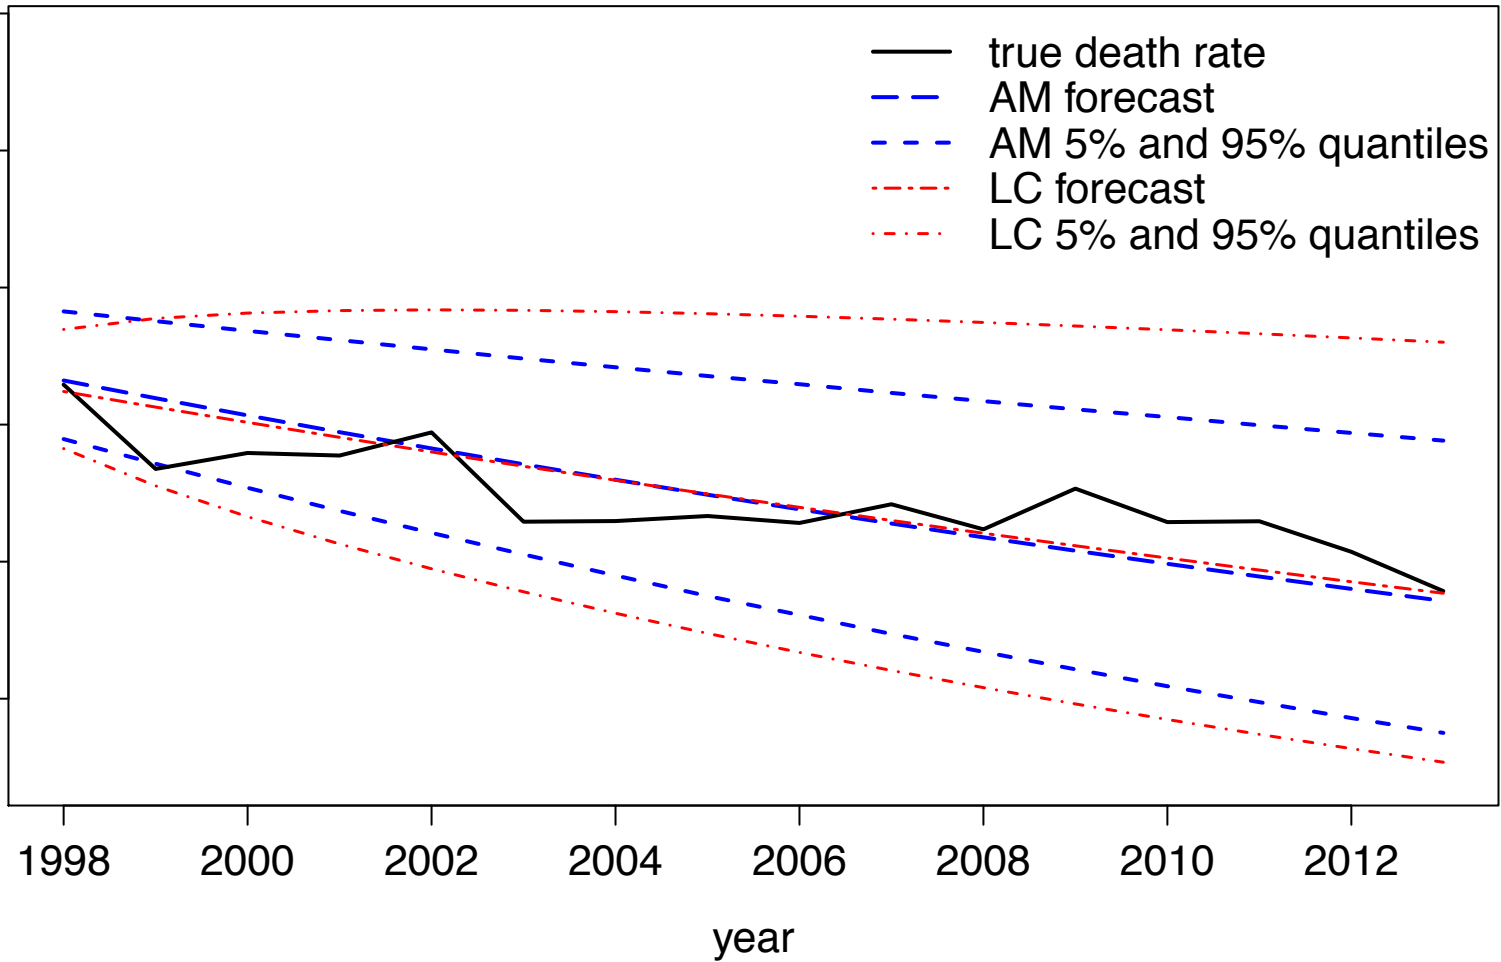

Supplement: s1 [file s1]
