# Supplementary material
Source: MDPI journal article supplement (https://www.mdpi.com/2227-9091/5/2/23)

probability density

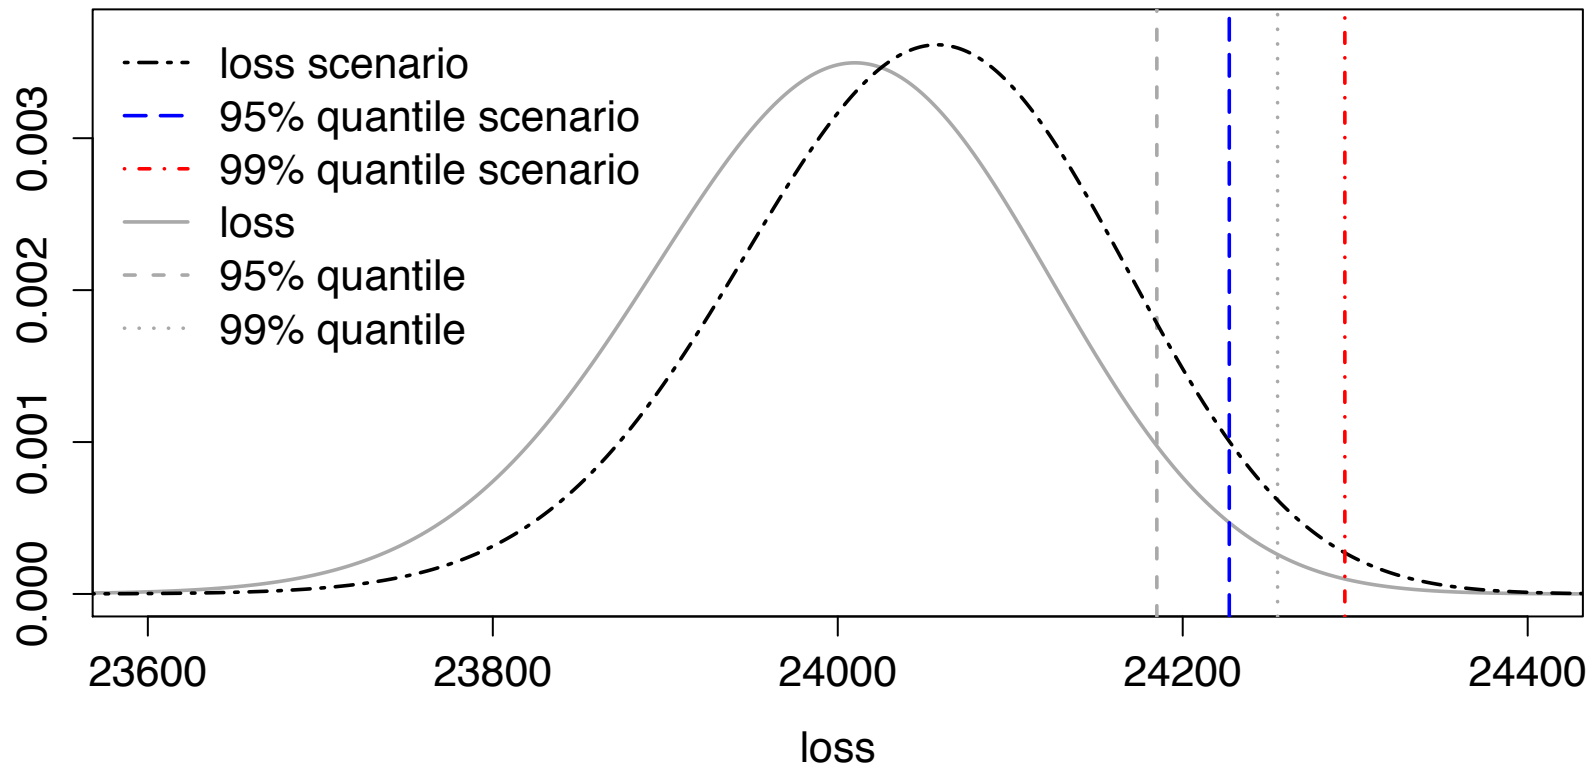

Supplement: s1 [file s1]

**(a)**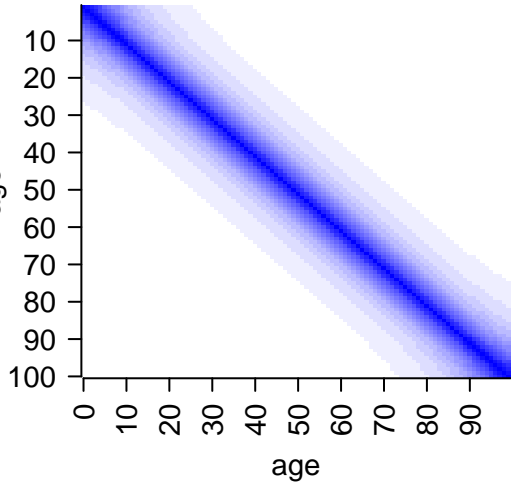**(b)**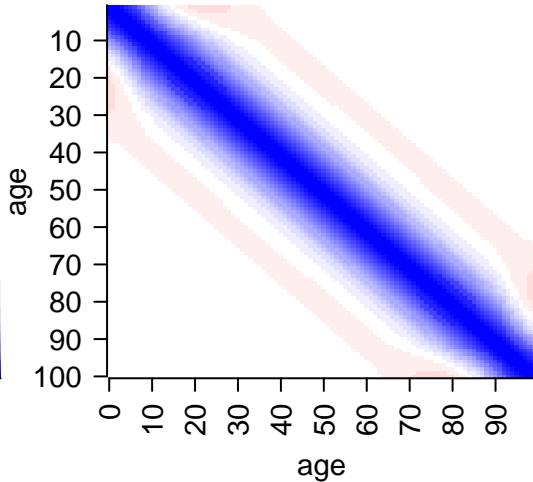**(c)**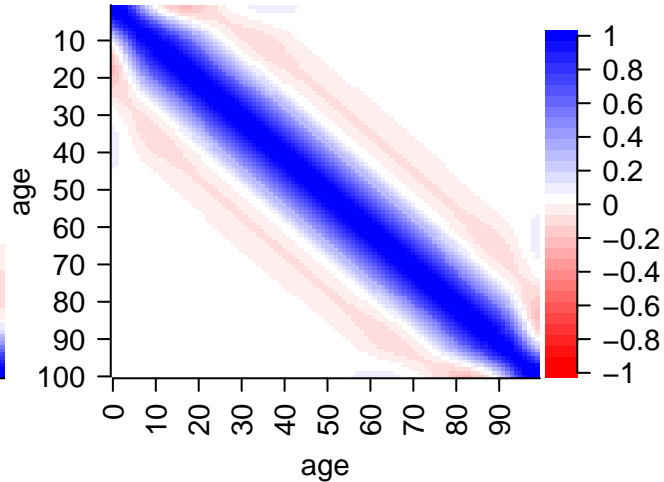

Supplement: s1 [file s1]

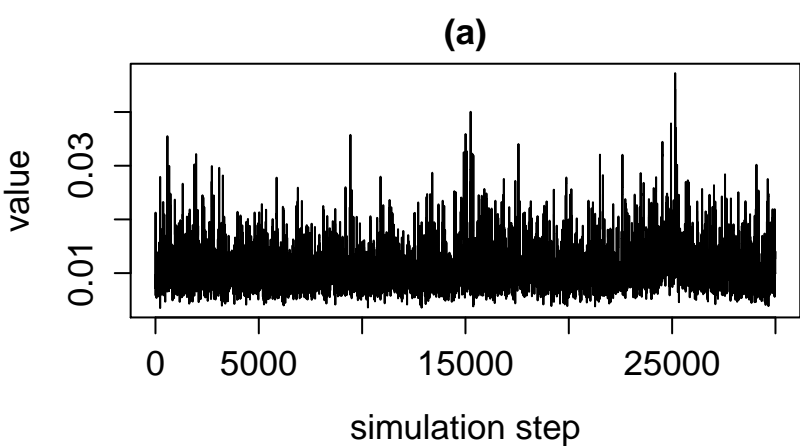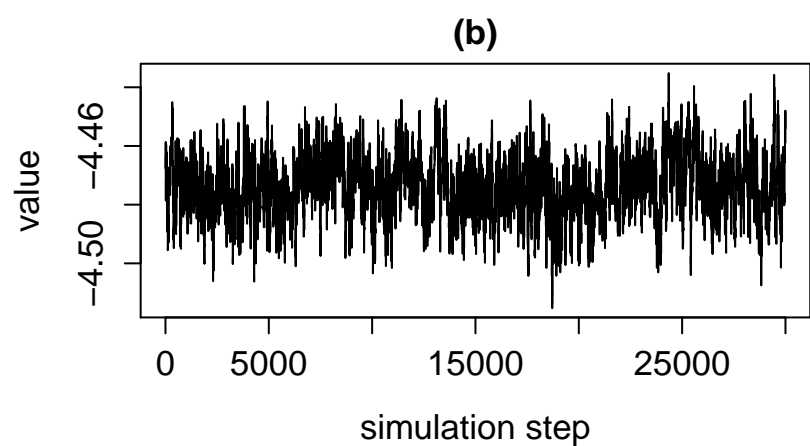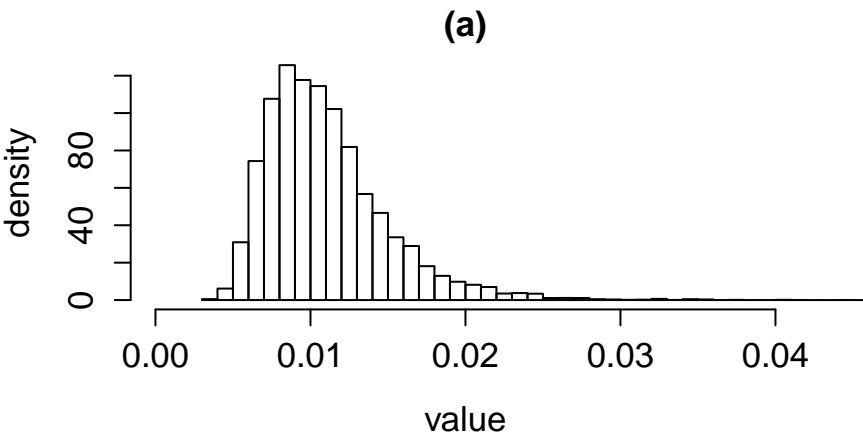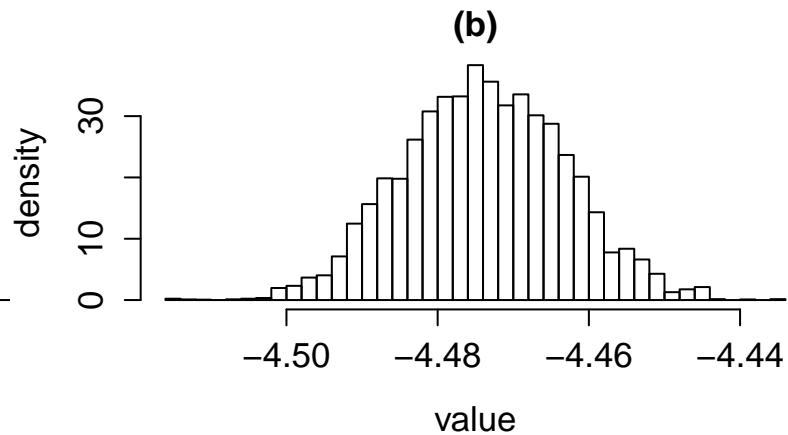

Supplement: s1 [file s1]

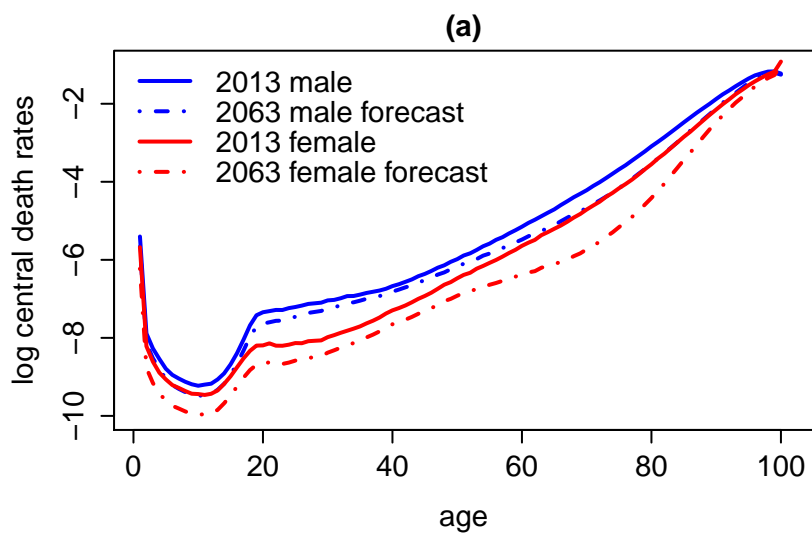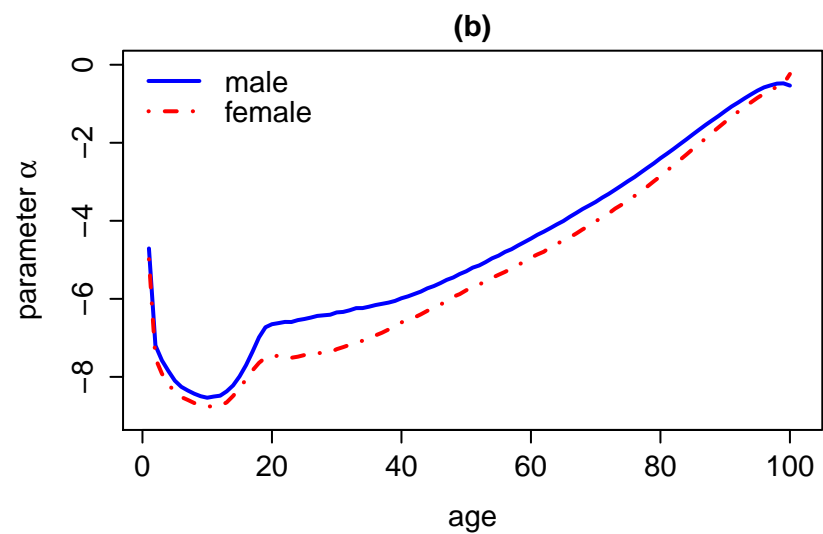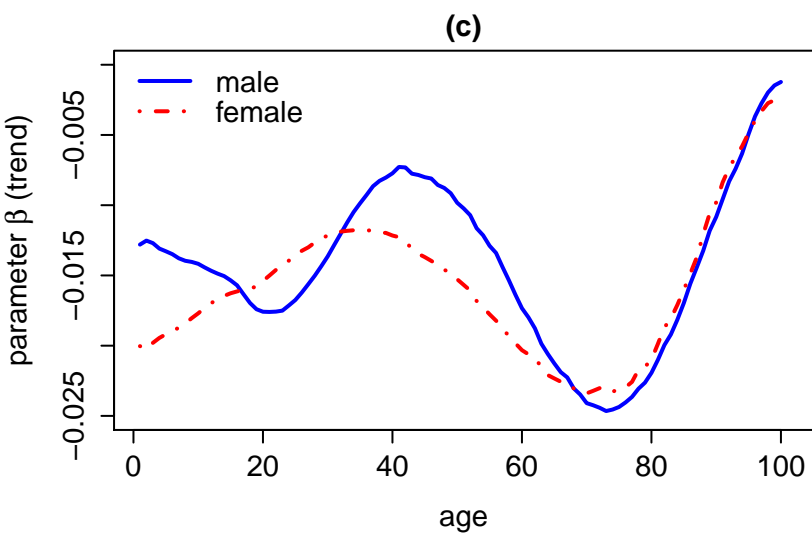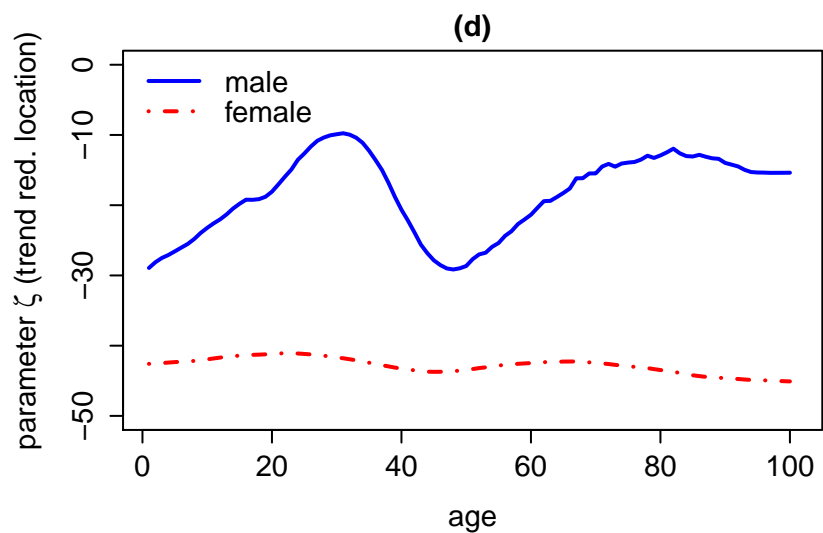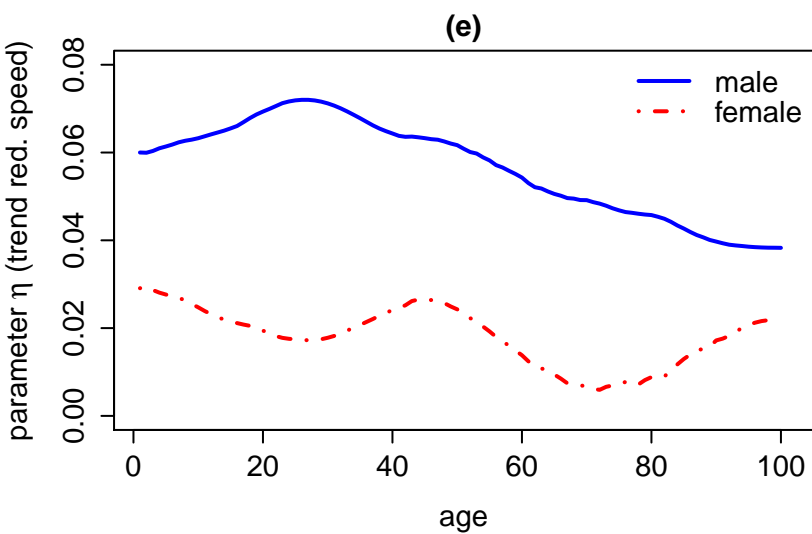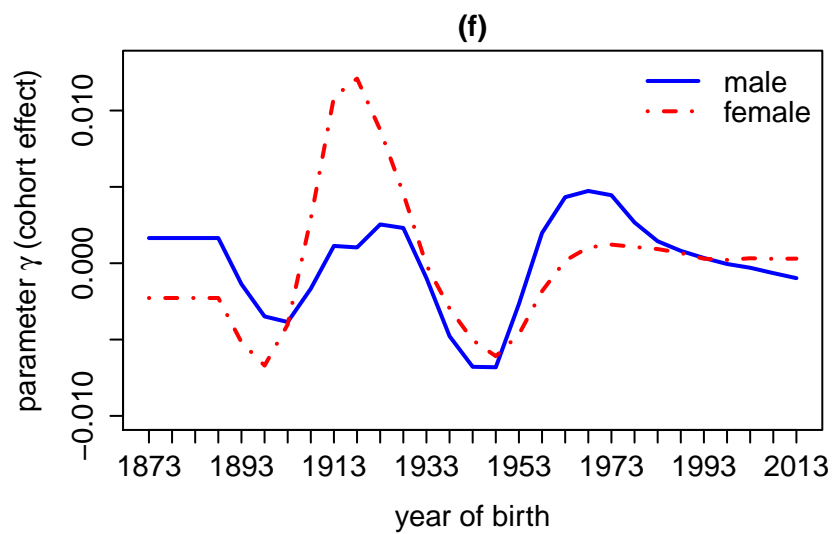

Supplement: s1 [file s1]

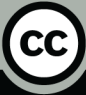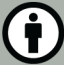

BY

Supplement: s1 [file s1]
